# Supplementary material for: Validity and interexaminer reliability of a new method to quantify skin neurofibromas of neurofibromatosis 1 using paper frames
Source: Springer Nature journal article supplement (doi:10.1186/s13023-014-0202-9), 2014-12-01
Supplement: MOESM1 [file 9775984]

Additional file 1 - Details of the clinical data and count of the skin neurofibromas of all individuals analyzed.

| Patient Code | Age | Gender | Skin color | Total number of skin neurofibromas | Number of skin neurofibromas using the paper frames method - Examiner A |      |      |        | Number of skin neurofibromas using the paper frames method - Examiner B |      |      |        |
|--------------|-----|--------|------------|------------------------------------|-------------------------------------------------------------------------|------|------|--------|-------------------------------------------------------------------------|------|------|--------|
|              |     |        |            |                                    | Abdomen                                                                 | Back | Tigh | Mean   | Abdomen                                                                 | Back | Tigh | Mean   |
| 1            | 46  | F      | W          | NE                                 | 27                                                                      | 16   | 6    | 16,33  | 35                                                                      | 11   | 6    | 17,33  |
| 2            | 45  | M      | W          | NE                                 | 142                                                                     | 202  | 13   | 119    | 115                                                                     | 124  | 13   | 127    |
| 3            | 66  | F      | W          | NE                                 | 207                                                                     | 527  | 42   | 258,66 | 190                                                                     | 435  | 42   | 222,33 |
| 4            | 35  | F      | W          | NE                                 | 26                                                                      | 48   | 8    | 27,33  | 24                                                                      | 48   | 8    | 26,66  |
| 5            | 71  | F      | W          | NE                                 | 159                                                                     | 123  | 5    | 95,66  | 139                                                                     | 111  | 4    | 84,66  |
| 6            | 23  | F      | W          | NE                                 | 124                                                                     | 121  | 16   | 87     | 124                                                                     | 121  | 16   | 87     |
| 7            | 52  | F      | W          | NE                                 | 178                                                                     | 78   | 14   | 90     | 179                                                                     | 79   | 14   | 90,66  |
| 8            | 46  | F      | W          | NE                                 | 227                                                                     | 319  | 16   | 187,33 | 149                                                                     | 356  | 16   | 173,66 |
| 9            | 35  | M      | B          | NE                                 | 130                                                                     | 145  | 15   | 96,66  | 132                                                                     | 139  | 16   | 95,66  |
| 10           | 28  | F      | B          | 375                                | 52                                                                      | 55   | 16   | 41     | 54                                                                      | 52   | 16   | 40,66  |
| 11           | 43  | M      | B          | 1254                               | 113                                                                     | 101  | 18   | 77,33  | 109                                                                     | 101  | 17   | 75,66  |
| 12           | 51  | M      | W          | NE                                 | 218                                                                     | 140  | 16   | 124,66 | 208                                                                     | 158  | 17   | 127,66 |
| 13           | 44  | F      | W          | 276                                | 74                                                                      | 5    | 6    | 28,33  | 76                                                                      | 5    | 8    | 29,66  |
| 14           | 54  | F      | W          | NE                                 | 111                                                                     | 90   | 20   | 73,66  | 114                                                                     | 95   | 21   | 76,66  |
| 15           | 67  | F      | W          | NE                                 | 153                                                                     | 167  | 52   | 124    | 159                                                                     | 166  | 51   | 125,33 |
| 16           | 37  | F      | B          | 73                                 | 9                                                                       | 15   | 0    | 8      | 8                                                                       | 15   | 2    | 8,33   |
| 17           | 58  | F      | W          | 34                                 | 0                                                                       | 5    | 0    | 1,66   | 0                                                                       | 5    | 0    | 1,66   |
| 18           | 31  | F      | W          | NE                                 | 29                                                                      | 19   | 5    | 17,66  | 29                                                                      | 19   | 5    | 17,66  |
| 19           | 26  | F      | W          | 520                                | 47                                                                      | 87   | 15   | 49,66  | 47                                                                      | 98   | 13   | 52,66  |
| 20           | 24  | F      | W          | 9                                  | 2                                                                       | 1    | 1    | 1,33   | 2                                                                       | 1    | 1    | 1,33   |
| 21           | 49  | F      | W          | NE                                 | 341                                                                     | 587  | 118  | 348,66 | 341                                                                     | 533  | 118  | 330,66 |
| 22           | 40  | F      | W          | NE                                 | 35                                                                      | 9    | 7    | 17     | 35                                                                      | 7    | 8    | 16,66  |
| 23           | 56  | F      | B          | 3602                               | 331                                                                     | 481  | 83   | 298,33 | 276                                                                     | 412  | 82   | 256,66 |
| 24           | 45  | F      | W          | NE                                 | 251                                                                     | 314  | 61   | 208,66 | 241                                                                     | 294  | 64   | 199,66 |
| 25           | 55  | F      | W          | NE                                 | 302                                                                     | 169  | 16   | 162,33 | 280                                                                     | 168  | 18   | 155,33 |
| 26           | 51  | M      | W          | NE                                 | 243                                                                     | 184  | 15   | 147,33 | 251                                                                     | 188  | 14   | 151    |
| 27           | 55  | F      | W          | NE                                 | 421                                                                     | 220  | 23   | 221,33 | 401                                                                     | 204  | 27   | 210,66 |
| 28           | 66  | M      | B          | NE                                 | 167                                                                     | 189  | 19   | 125    | 170                                                                     | 186  | 19   | 125    |
| 29           | 54  | F      | W          | NE                                 | 271                                                                     | 215  | 51   | 179    | 269                                                                     | 220  | 49   | 179,33 |
| 30           | 44  | F      | W          | NE                                 | 66                                                                      | 66   | 45   | 59     | 74                                                                      | 57   | 41   | 57,33  |
| 31           | 37  | F      | W          | 769                                | 86                                                                      | 116  | 20   | 74     | 86                                                                      | 115  | 20   | 73,66  |
| 32           | 23  | F      | W          | 27                                 | 4                                                                       | 11   | 22   | 12,33  | 3                                                                       | 11   | 22   | 12     |
| 33           | 32  | F      | W          | 40                                 | 3                                                                       | 7    | 2    | 4      | 3                                                                       | 7    | 2    | 4      |
| 34           | 31  | M      | W          | NE                                 | 3                                                                       | 0    | 1    | 1,33   | 3                                                                       | 0    | 1    | 1,33   |
| 35           | 39  | F      | W          | NE                                 | 289                                                                     | 342  | 30   | 220,33 | 313                                                                     | 253  | 33   | 199,66 |
| 36           | 37  | F      | B          | 364                                | 37                                                                      | 74   | 8    | 39,66  | 37                                                                      | 71   | 8    | 38,66  |
| 37           | 16  | M      | B          | 35                                 | 6                                                                       | 9    | 0    | 5      | 7                                                                       | 9    | 0    | 5,33   |
| 38           | 13  | F      | W          | 6                                  | 1                                                                       | 1    | 1    | 1      | 1                                                                       | 1    | 1    | 1      |
| 39           | 37  | M      | W          | 1310                               | 496                                                                     | 420  | 40   | 318,66 | 475                                                                     | 406  | 40   | 307    |
| 40           | 42  | F      | W          | 129                                | 31                                                                      | 11   | 6    | 16     | 32                                                                      | 10   | 6    | 16     |
| 41           | 64  | F      | W          | NE                                 | 92                                                                      | 49   | 15   | 52     | 91                                                                      | 51   | 15   | 52,33  |
| 42           | 47  | M      | B          | NE                                 | 44                                                                      | 31   | 3    | 26     | 44                                                                      | 31   | 3    | 26     |
| 43           | 45  | F      | W          | NE                                 | 7                                                                       | 9    | 0    | 5,33   | 8                                                                       | 9    | 0    | 5,66   |
| 44           | 19  | M      | W          | 14                                 | 0                                                                       | 2    | 0    | 0,66   | 2                                                                       | 0    | 0    | 0,66   |
| 45           | 68  | M      | W          | 25                                 | 3                                                                       | 4    | 1    | 2,66   | 4                                                                       | 3    | 1    | 2,66   |
| 46           | 43  | M      | W          | 41                                 | 5                                                                       | 13   | 2    | 6,66   | 5                                                                       | 13   | 2    | 6,66   |
| 47           | 45  | F      | W          | NE                                 | 281                                                                     | 327  | 11   | 206,33 | 287                                                                     | 323  | 11   | 207    |
| 48           | 61  | F      | W          | NE                                 | 154                                                                     | 88   | 1    | 81     | 156                                                                     | 86   | 1    | 81     |
| 49           | 25  | F      | B          | 183                                | 40                                                                      | 22   | 3    | 21,66  | 41                                                                      | 22   | 3    | 22     |
| 50           | 54  | M      | B          | 600                                | 48                                                                      | 35   | 3    | 28,66  | 49                                                                      | 35   | 2    | 28,66  |
| 51           | 56  | F      | W          | NE                                 | 191                                                                     | 104  | 0    | 98,33  | 194                                                                     | 102  | 0    | 98,66  |
| 52           | 24  | F      | W          | NE                                 | 17                                                                      | 71   | 5    | 31     | 18                                                                      | 72   | 5    | 31,66  |
| 53           | 29  | F      | W          | 140                                | 24                                                                      | 14   | 1    | 13     | 26                                                                      | 14   | 1    | 13,66  |
| 55           | 26  | F      | B          | 12                                 | 0                                                                       | 0    | 0    | 0      | 0                                                                       | 0    | 0    | 0      |
| 56           | 39  | F      | B          | NE                                 | 67                                                                      | 136  | 18   | 73,66  | 67                                                                      | 123  | 18   | 69,33  |
| 57           | 62  | F      | W          | NE                                 | 152                                                                     | 196  | 40   | 129,33 | 167                                                                     | 204  | 42   | 137,66 |
| 58           | 77  | F      | B          | NE                                 | 76                                                                      | 71   | 0    | 49     | 80                                                                      | 74   | 0    | 51,33  |
| 59           | 23  | M      | W          | NE                                 | 53                                                                      | 27   | 1    | 27     | 53                                                                      | 29   | 1    | 27,66  |
| 60           | 41  | F      | W          | 200                                | 38                                                                      | 15   | 2    | 18,33  | 40                                                                      | 15   | 2    | 19     |
| 61           | 28  | F      | W          | NE                                 | 51                                                                      | 45   | 6    | 34     | 48                                                                      | 46   | 6    | 33,33  |
| 62           | 16  | M      | B          | NE                                 | 0                                                                       | 0    | 1    | 0,33   | 0                                                                       | 0    | 1    | 0,33   |
| 63           | 48  | F      | W          | NE                                 | 121                                                                     | 121  | 6    | 82,66  | 113                                                                     | 140  | 7    | 86,66  |
| 64           | 15  | F      | B          | 0                                  | 0                                                                       | 0    | 0    | 0      | 0                                                                       | 0    | 0    | 0      |
| 65           | 30  | M      | B          | NE                                 | 5                                                                       | 7    | 1    | 4,33   | 4                                                                       | 7    | 1    | 4      |
| 66           | 37  | F      | B          | NE                                 | 43                                                                      | 58   | 5    | 35,33  | 44                                                                      | 59   | 3    | 36     |
| 67           | 22  | M      | W          | 3                                  | 0                                                                       | 0    | 0    | 0      | 0                                                                       | 0    | 0    | 0      |
| 70           | 48  | F      | W          | NE                                 | 37                                                                      | 5    | 2    | 14,66  | 39                                                                      | 5    | 3    | 15,66  |
| 71           | 17  | F      | W          | 32                                 | 7                                                                       | 7    | 0    | 4,66   | 7                                                                       | 7    | 0    | 4,66   |
| 72           | 54  | F      | W          | NE                                 | 38                                                                      | 32   | 3    | 24,33  | 37                                                                      | 33   | 3    | 24,33  |
| 73           | 41  | F      | W          | 340                                | 61                                                                      | 16   | 19   | 32     | 61                                                                      | 17   | 19   | 32,33  |
| 74           | 27  | F      | W          | 84                                 | 9                                                                       | 16   | 0    | 8,33   | 9                                                                       | 17   | 0    | 8,66   |
| 75           | 15  | F      | B          | 2                                  | 0                                                                       | 0    | 0    | 0      | 0                                                                       | 0    | 0    | 0      |
| 76           | 21  | M      | B          | 68                                 | 0                                                                       | 0    | 0    | 0      | 0                                                                       | 0    | 0    | 0      |
| 77           | 32  | F      | W          | NE                                 | 109                                                                     | 121  | 21   | 83,66  | 108                                                                     | 127  | 21   | 85,33  |
| 78           | 13  | F      | B          | 2                                  | 0                                                                       | 0    | 0    | 0      | 0                                                                       | 0    | 0    | 0      |
| 79           | 33  | F      | B          | 87                                 | 24                                                                      | 42   | 3    | 23     | 24                                                                      | 43   | 4    | 23,66  |
| 80           | 46  | M      | B          | 320                                | 73                                                                      | 59   | 1    | 44,33  | 74                                                                      | 58   | 2    | 44,66  |
| 82           | 39  | M      | W          | 308                                | 79                                                                      | 113  | 4    | 65,33  | 123                                                                     | 83   | 4    | 70     |
| 83           | 47  | M      | W          | 1420                               | 125                                                                     | 126  | 13   | 88     | 129                                                                     | 121  | 14   | 88     |
| 84           | 45  | F      | B          | 440                                | 71                                                                      | 158  | 18   | 82,33  | 78                                                                      | 181  | 18   | 92,33  |
| 85           | 24  | M      | W          | 244                                | 16                                                                      | 69   | 5    | 30     | 17                                                                      | 69   | 5    | 30,33  |
| 86           | 12  | F      | W          | 3                                  | 1                                                                       | 2    | 0    | 1      | 1                                                                       | 2    | 0    | 1      |
| 87           | 34  | M      | B          | 511                                | 55                                                                      | 123  | 8    | 62     | 58                                                                      | 140  | 8    | 68,66  |
| 88           | 39  | M      | B          | 676                                | 41                                                                      | 70   | 1    | 37,33  | 41                                                                      | 76   | 1    | 39,33  |
| 89           | 53  | F      | B          | 440                                | 55                                                                      | 79   | 28   | 54     | 56                                                                      | 84   | 26   | 55,33  |
| 90           | 41  | M      | W          | 1483                               | 116                                                                     | 68   | 8    | 64     | 111                                                                     | 87   | 8    | 68,66  |
| 91           | 72  | M      | B          | 1235                               | 151                                                                     | 142  | 42   | 111,67 | 166                                                                     | 146  | 43   | 118,33 |
| 93           | 41  | F      | B          | 3816                               | 205                                                                     | 222  | 23   | 150    | 238                                                                     | 228  | 22   | 162,66 |
| 94           | 29  | M      | B          | 310                                | 130                                                                     | 48   | 3    | 60,33  | 138                                                                     | 48   | 3    | 63     |
| 95           | 75  | M      | W          | 178                                | 10                                                                      | 3    | 3    | 5,33   | 10                                                                      | 4    | 2    | 5,33   |
| 96           | 39  | M      | W          | 178                                | 40                                                                      | 5    | 2    | 15,66  | 38                                                                      | 8    | 2    | 16     |
| 97           | 56  | F      | B          | 1568                               | 80                                                                      | 216  | 3    | 99,66  | 87                                                                      | 225  | 1    | 104,33 |

NE = not evaluated; F = female; M = male; W = white; B = black
